# Supplementary material for: Shared origins of a key enzyme during the evolution of C4 and CAM metabolism
Source: PubMed Central journal article supplement (PMC4085957; doi:10.1093/jxb/eru087), 2014-03-17
Supplement: supp_eru087_eru087_SI.pdf [file supp_eru087_eru087_SI.pdf]

Supplementary Material for:

## Shared origins of a key enzyme during the evolution of C<sub>4</sub> and CAM metabolism

Pascal-Antoine Christin, Monica Arakaki, Colin P. Osborne, Andrea Bräutigam, Rowan F. Sage, Julian M. Hibberd, Steven Kelly, Sarah Covshoff, Gane Ka-Shu Wong, Lillian Hancock, Erika J. Edwards

A

Caryophyllales, panel C

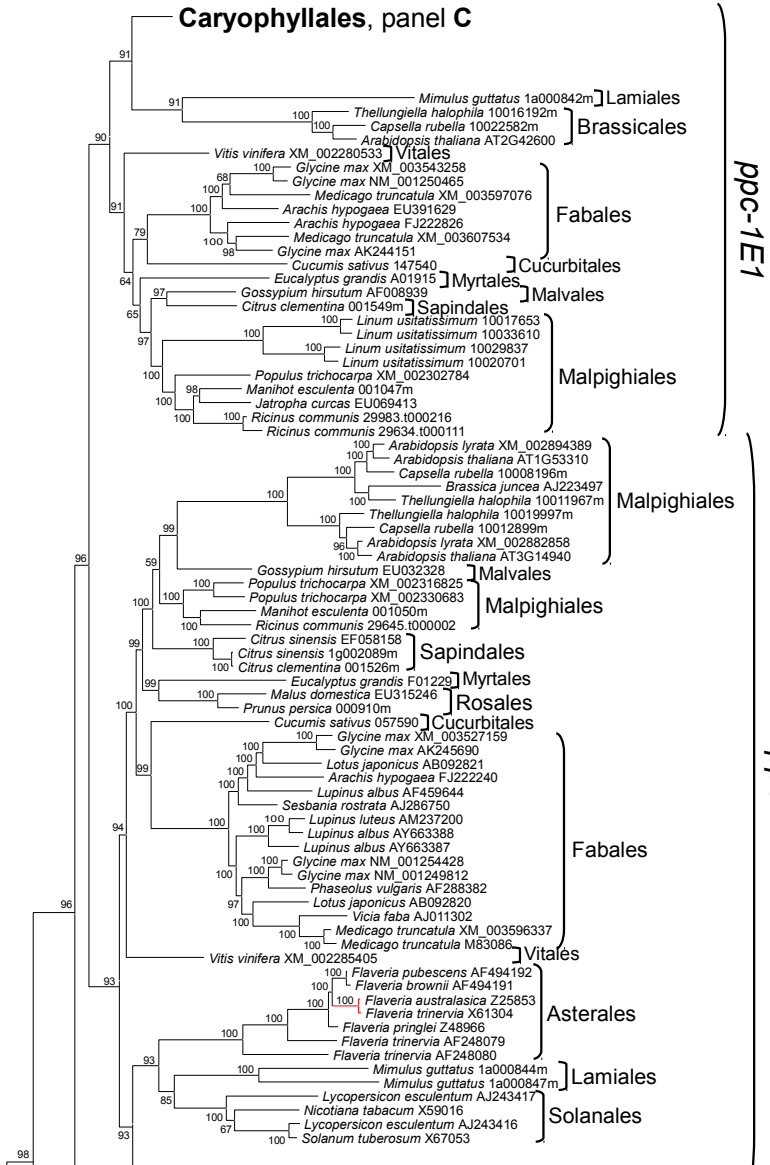

Caryophyllales, panel B

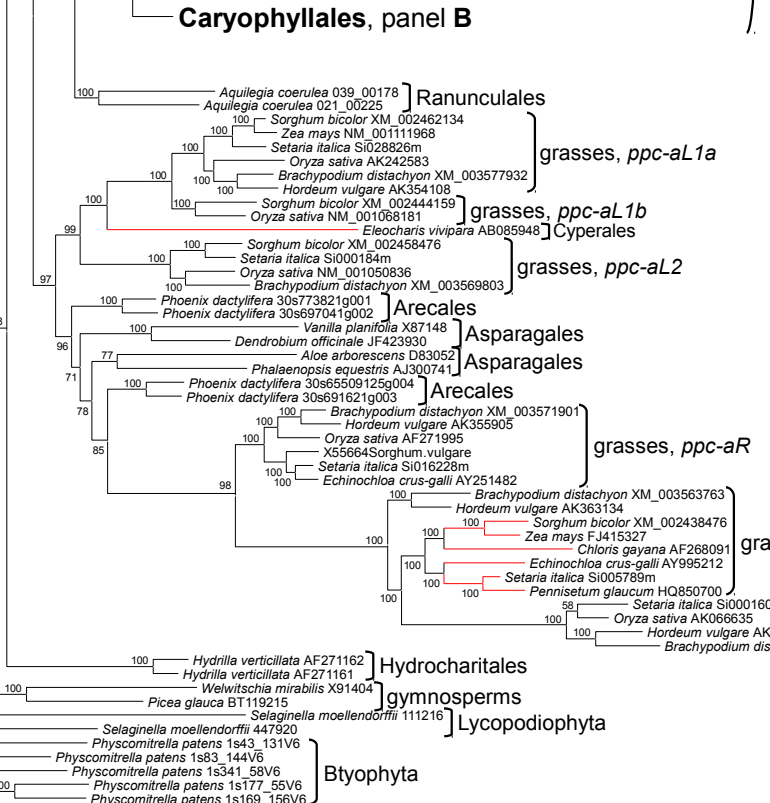

0.1

monocots

**B**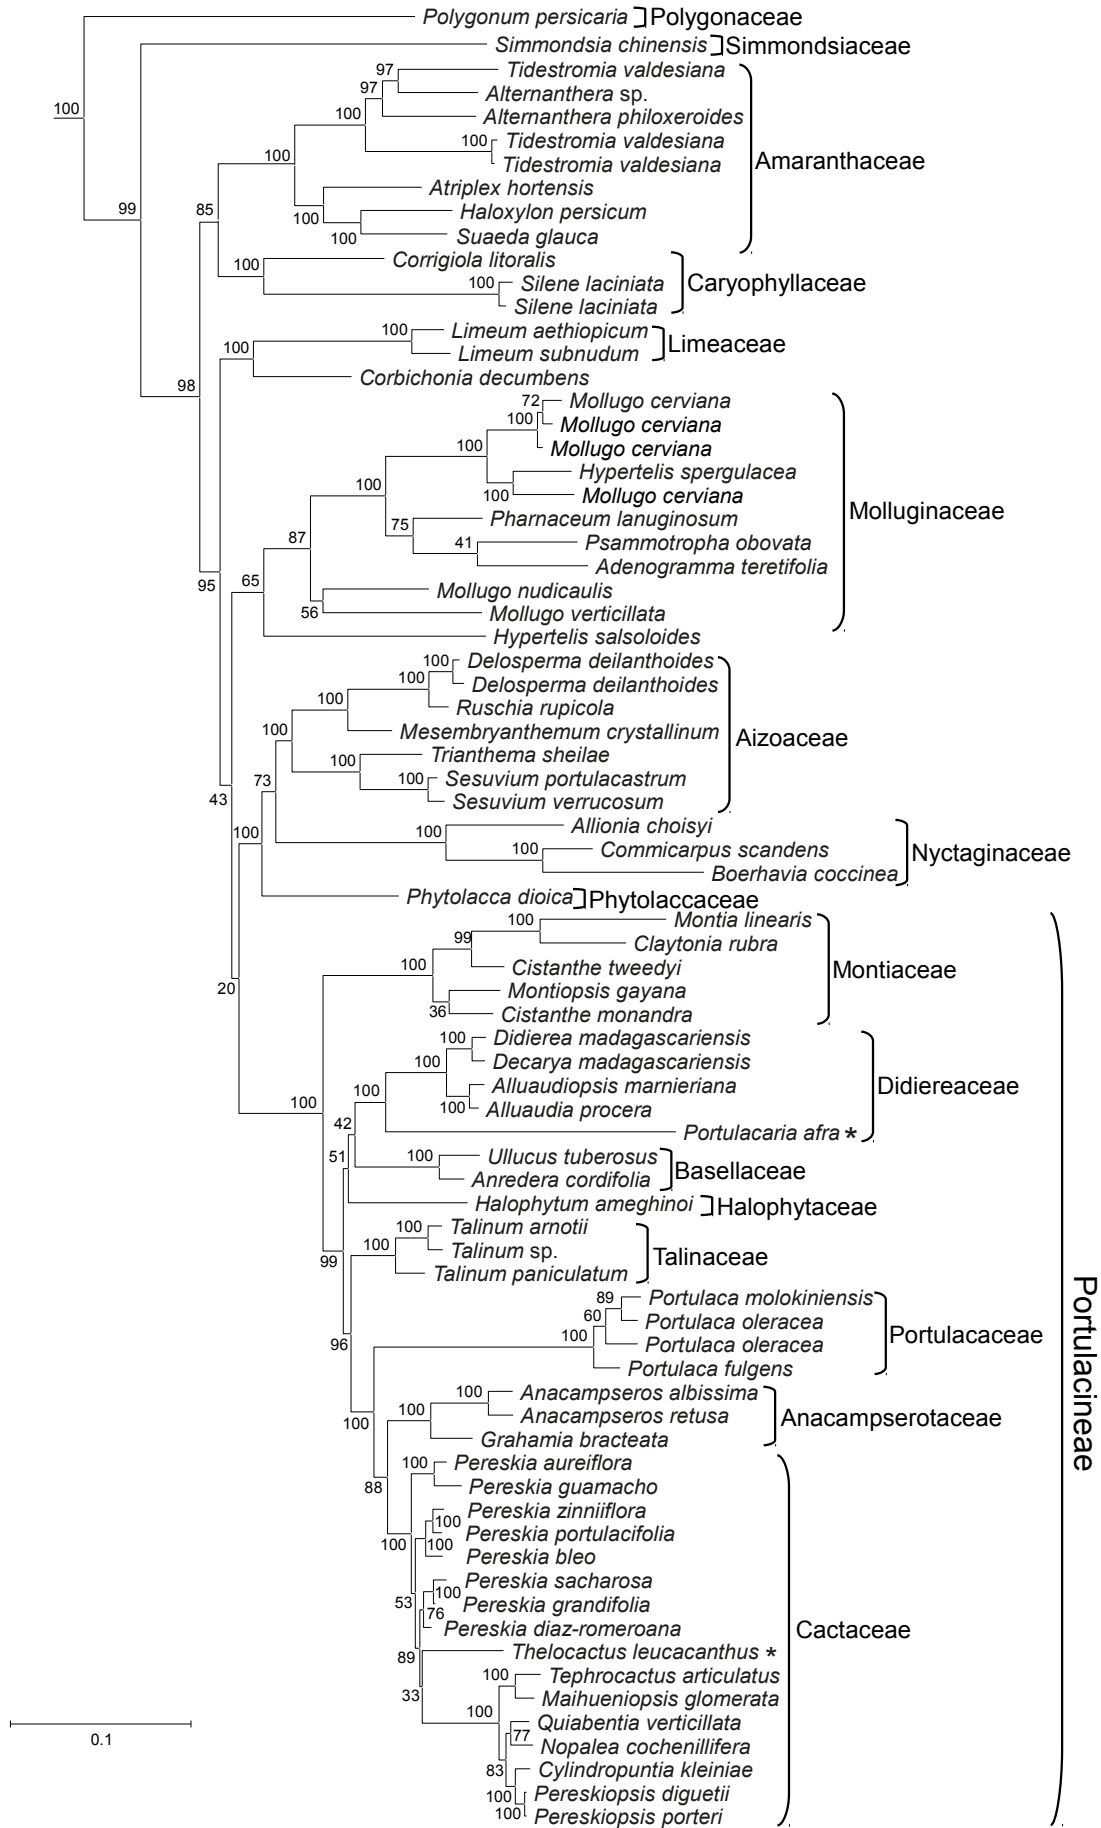

**C****panel D**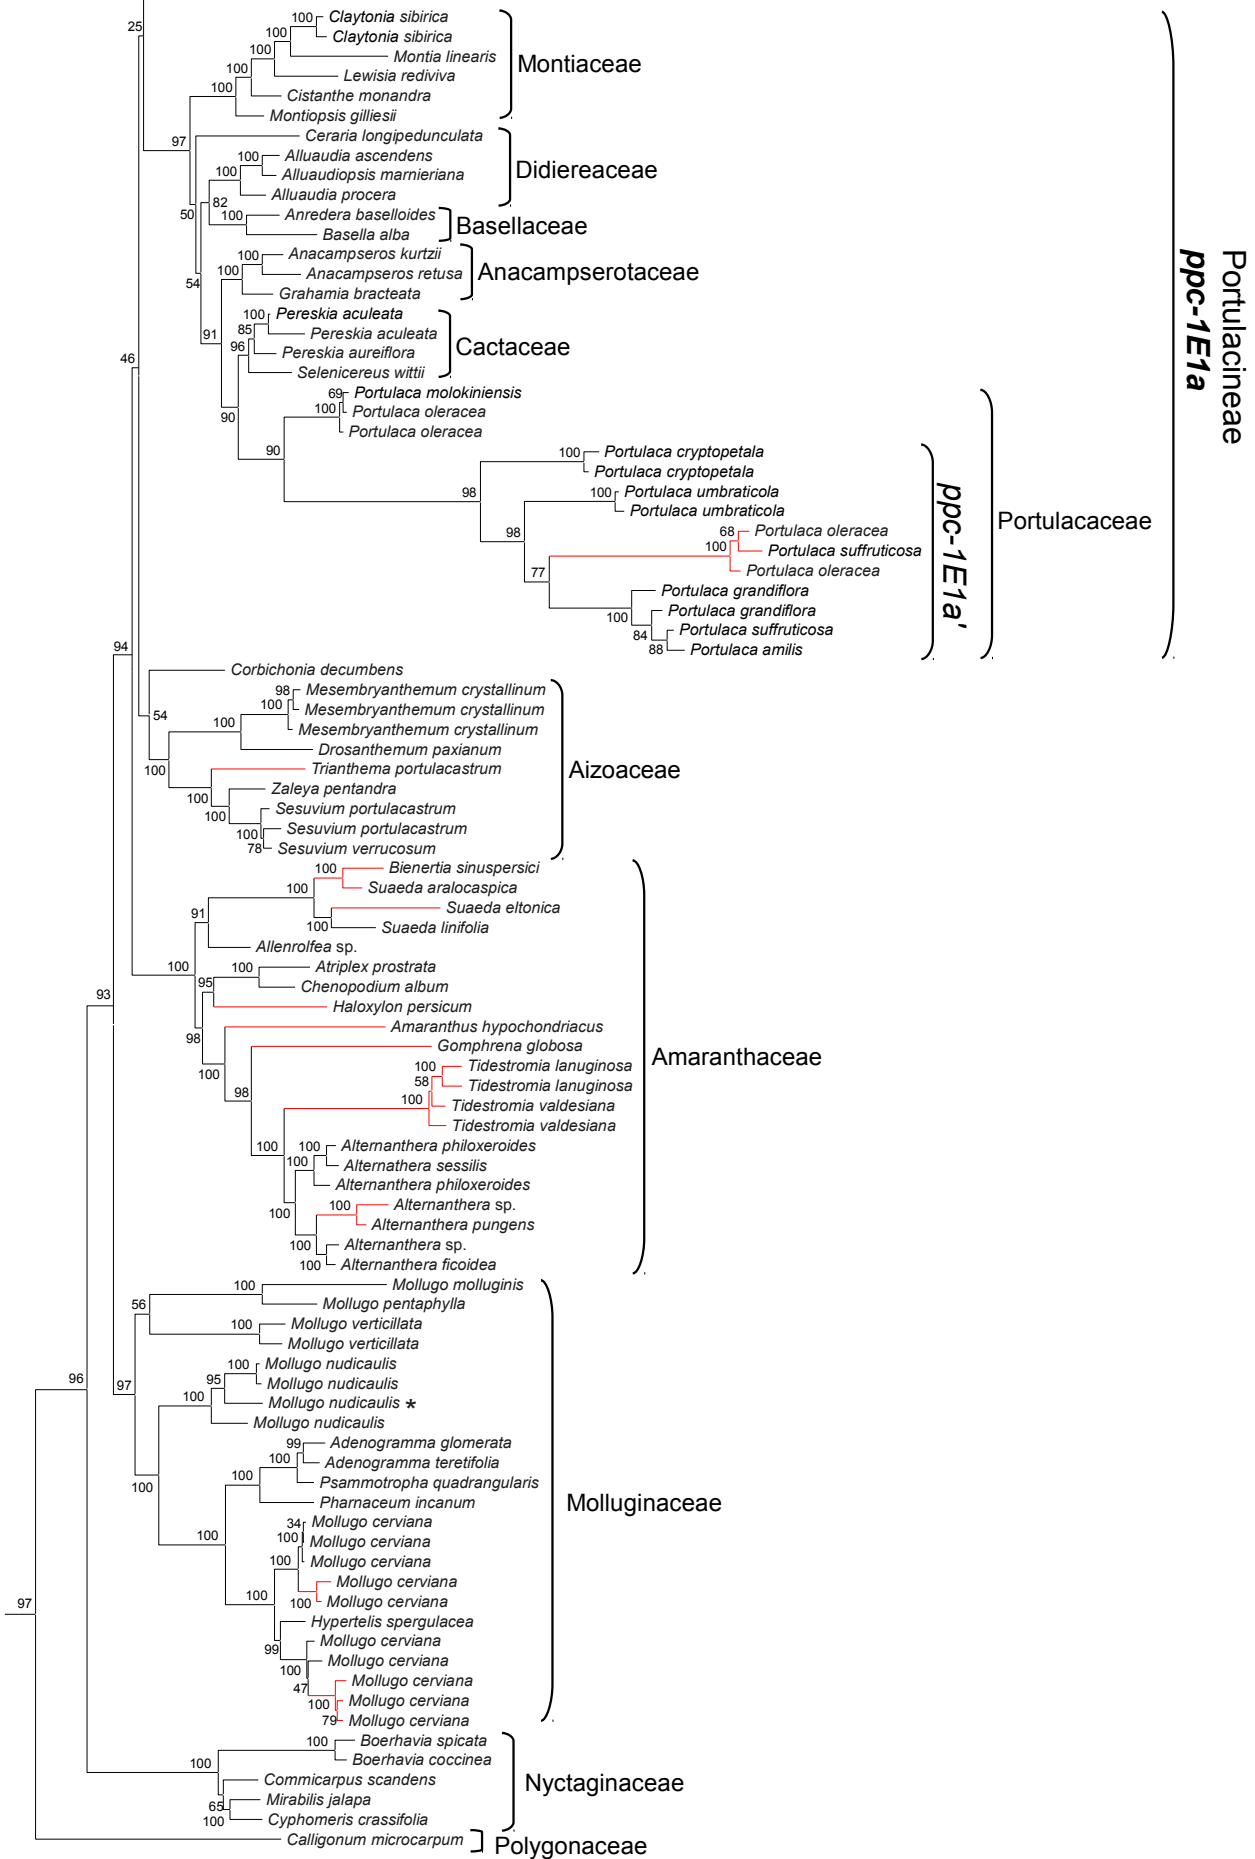

**D**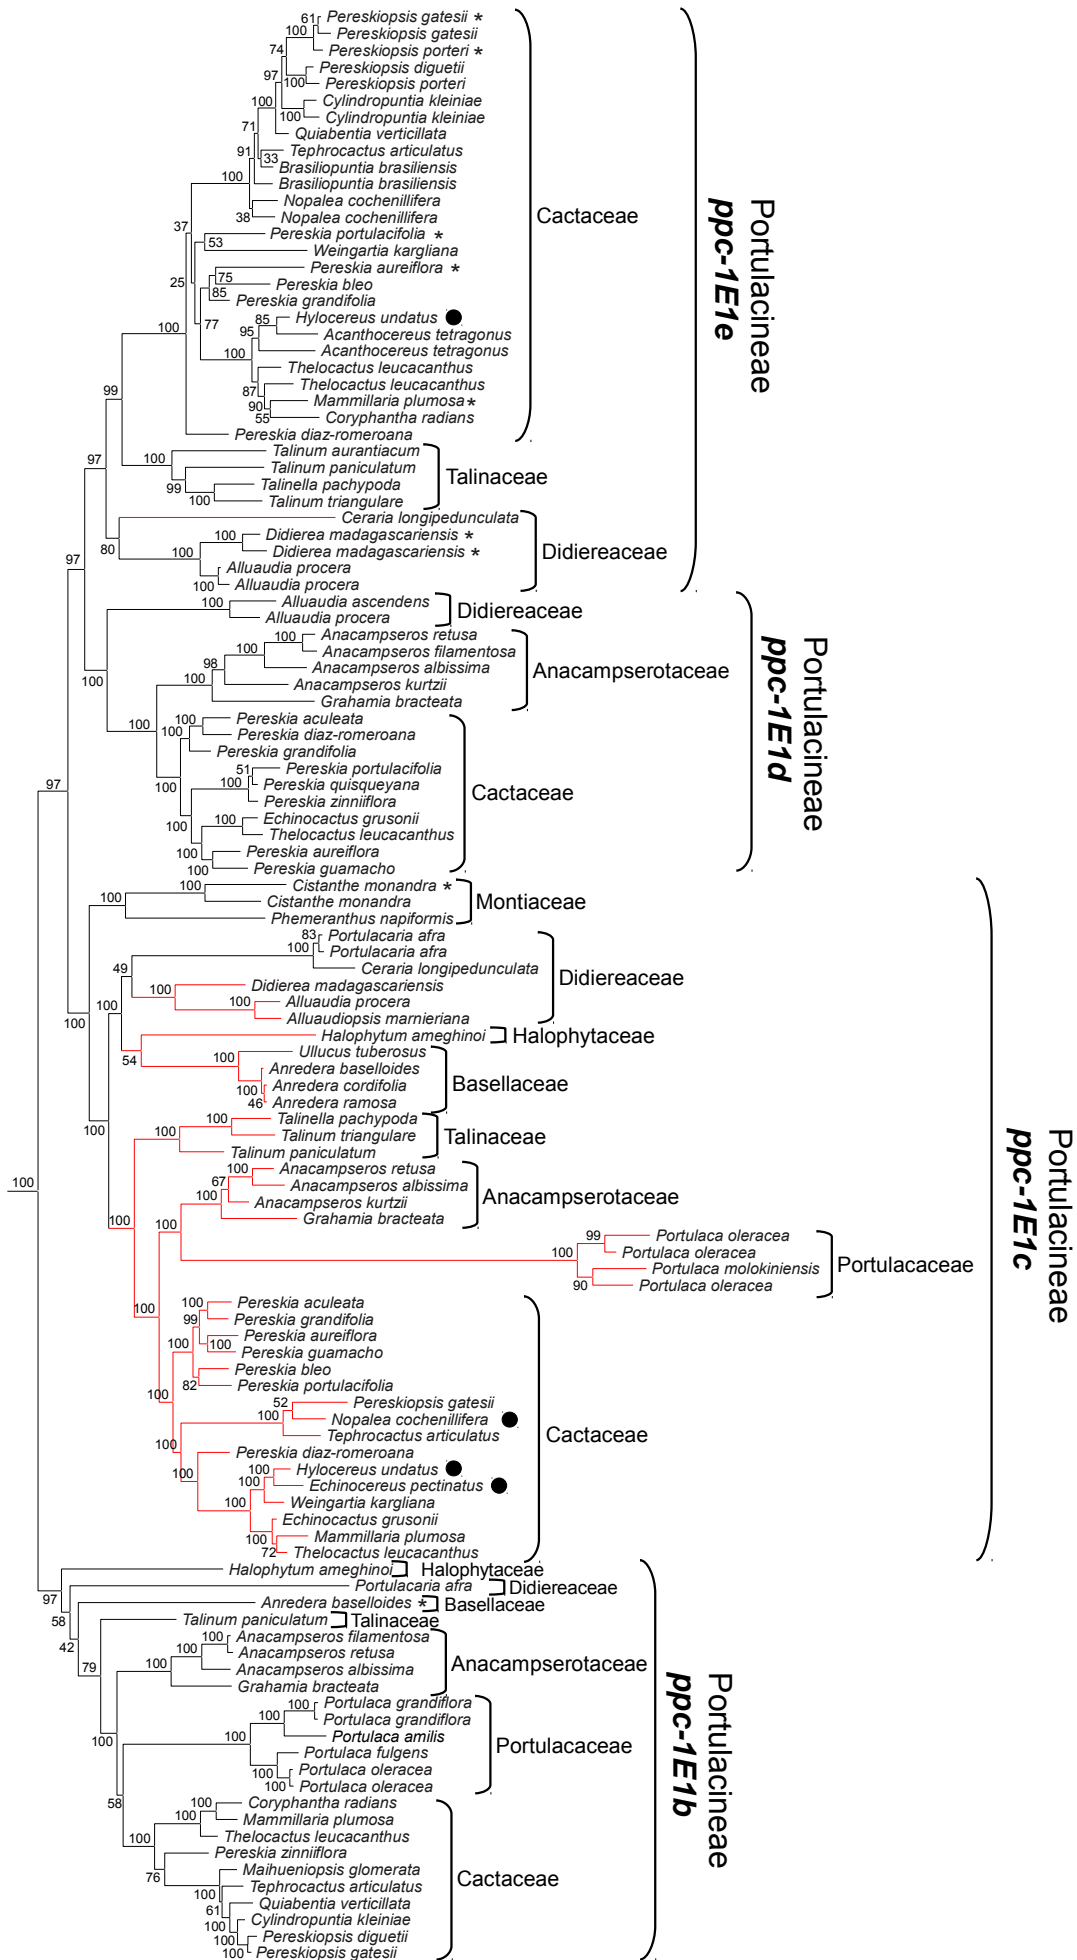

0.1

**Supplementary Figure 1: Phylogenetic relationships among *ppc-1* genes.**

This phylogenetic tree was obtained through Bayesian inference on nucleotide sequences. Names of taxonomic groups and gene lineages are indicated on the right. Branches in lineages presenting a Ser780 are highlighted in red. Bayesian support values are indicated near branches. Asterisks indicate putative pseudogenes with one or several stop codons in the coding sequence. Black circles indicate sequences that were isolated from cacti cDNA. **A** Complete phylogenetic tree, **B** *ppc-1E2* of Caryophyllales, **C** and **D** *ppc-1E1* of Caryophyllales.

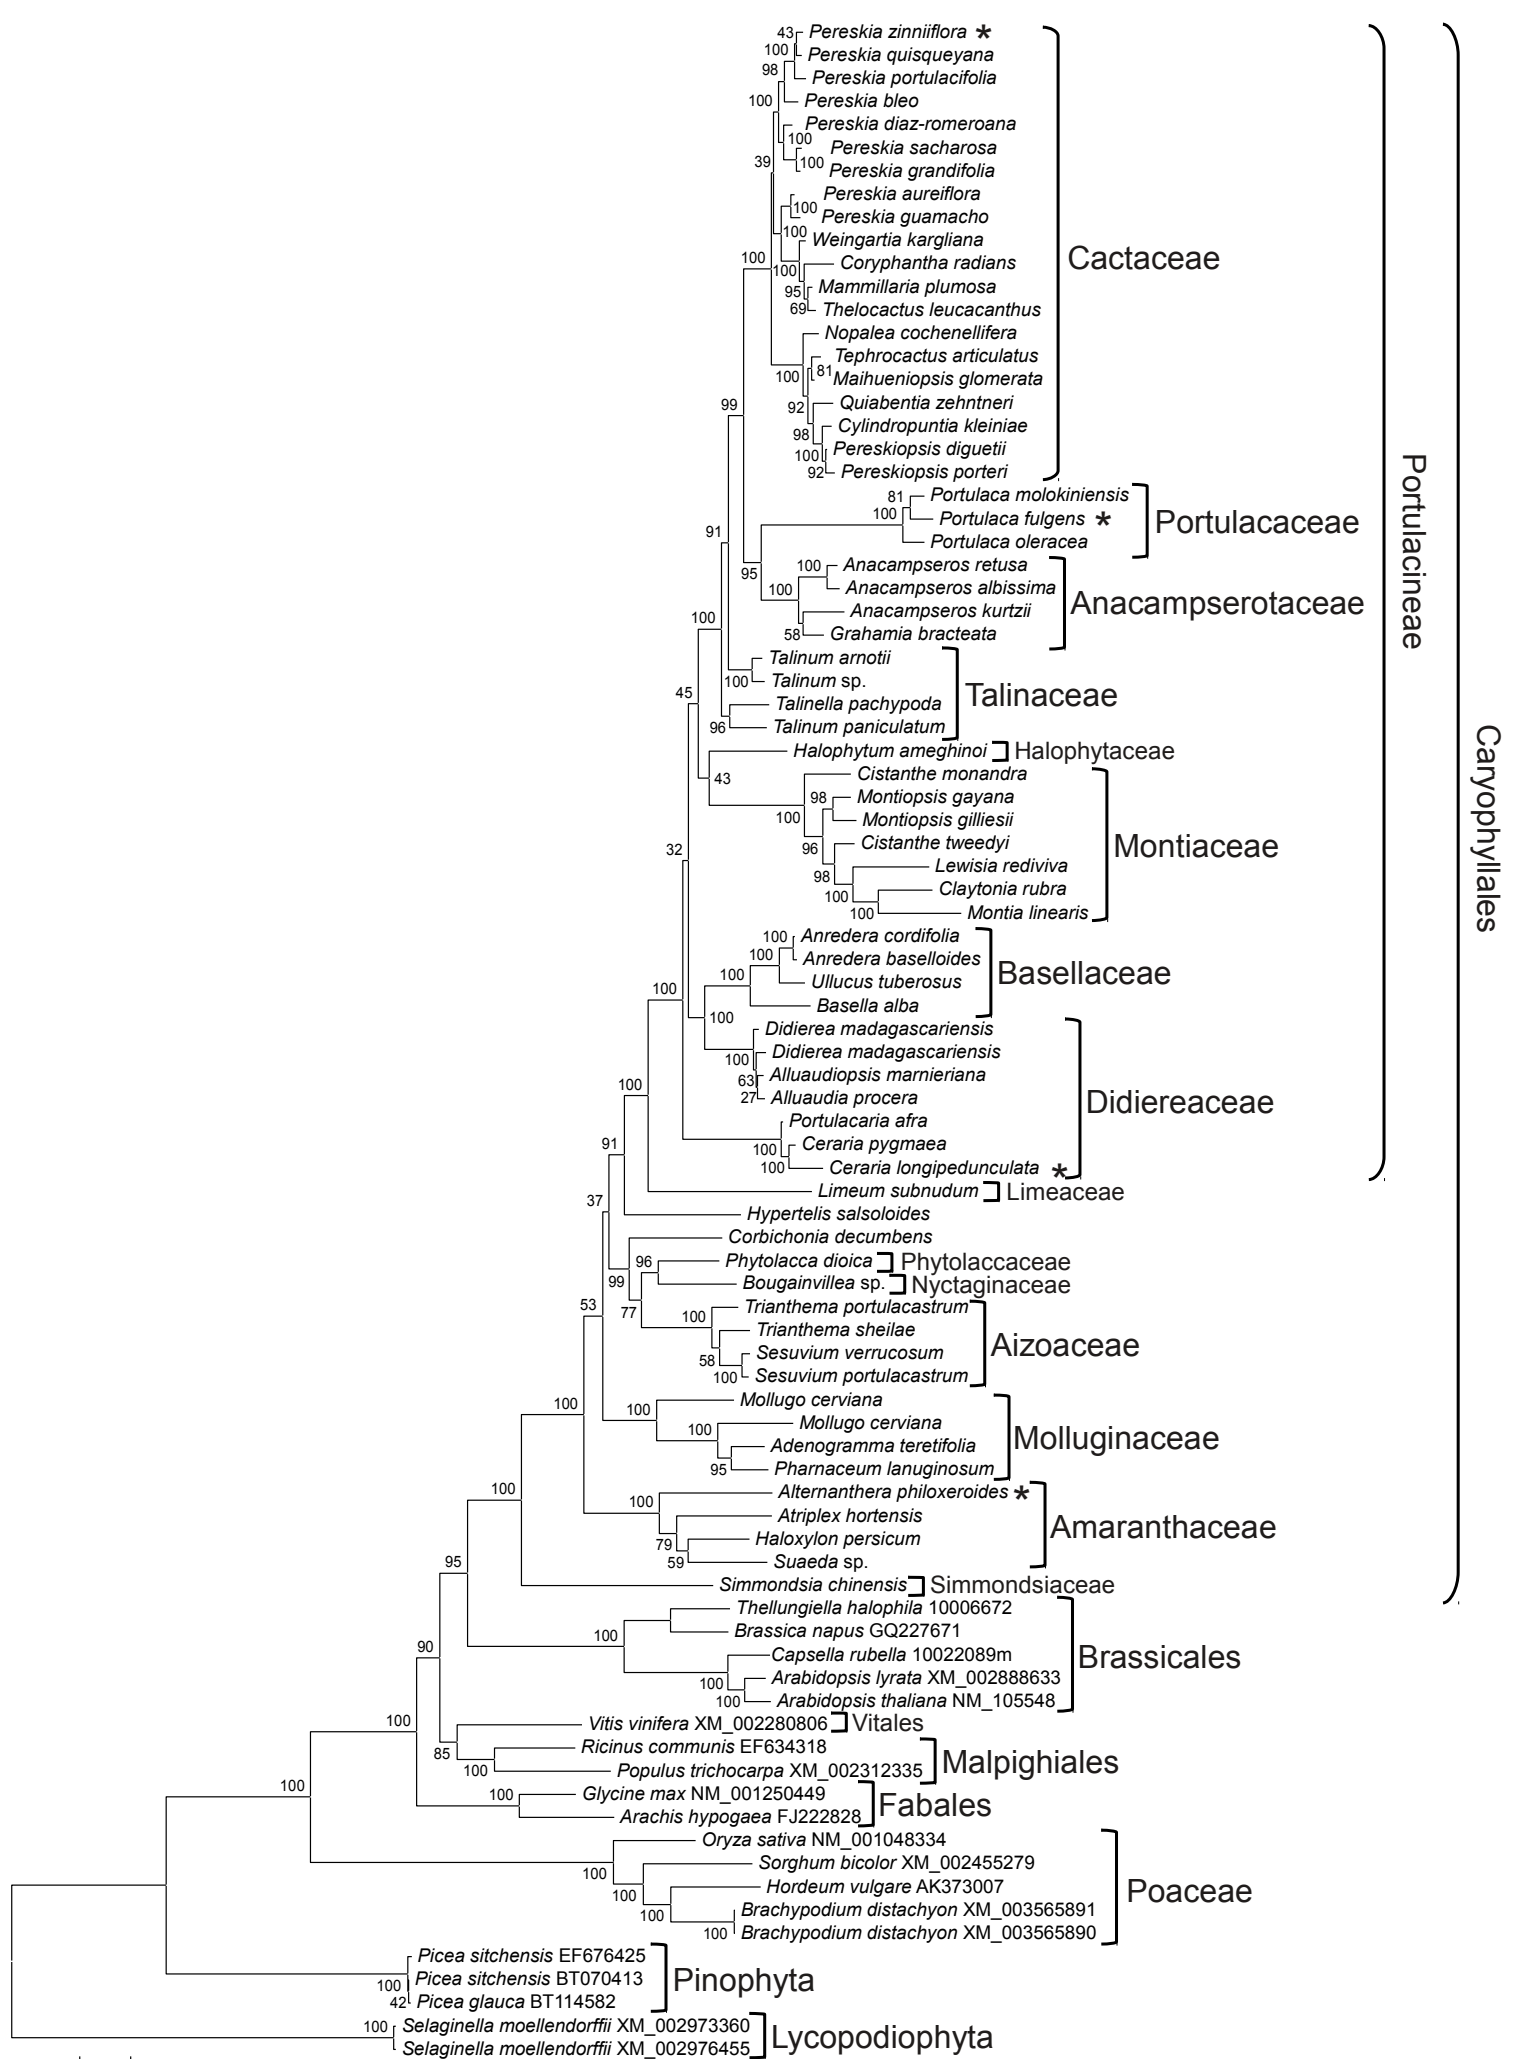

0.05

**Supplementary Figure 2: Phylogenetic relationships among *ppc-2* genes.**

This phylogenetic tree was obtained through Bayesian inference on nucleotide sequences. Names of taxonomic groups are indicated on the right. Bayesian support values are indicated near branches.



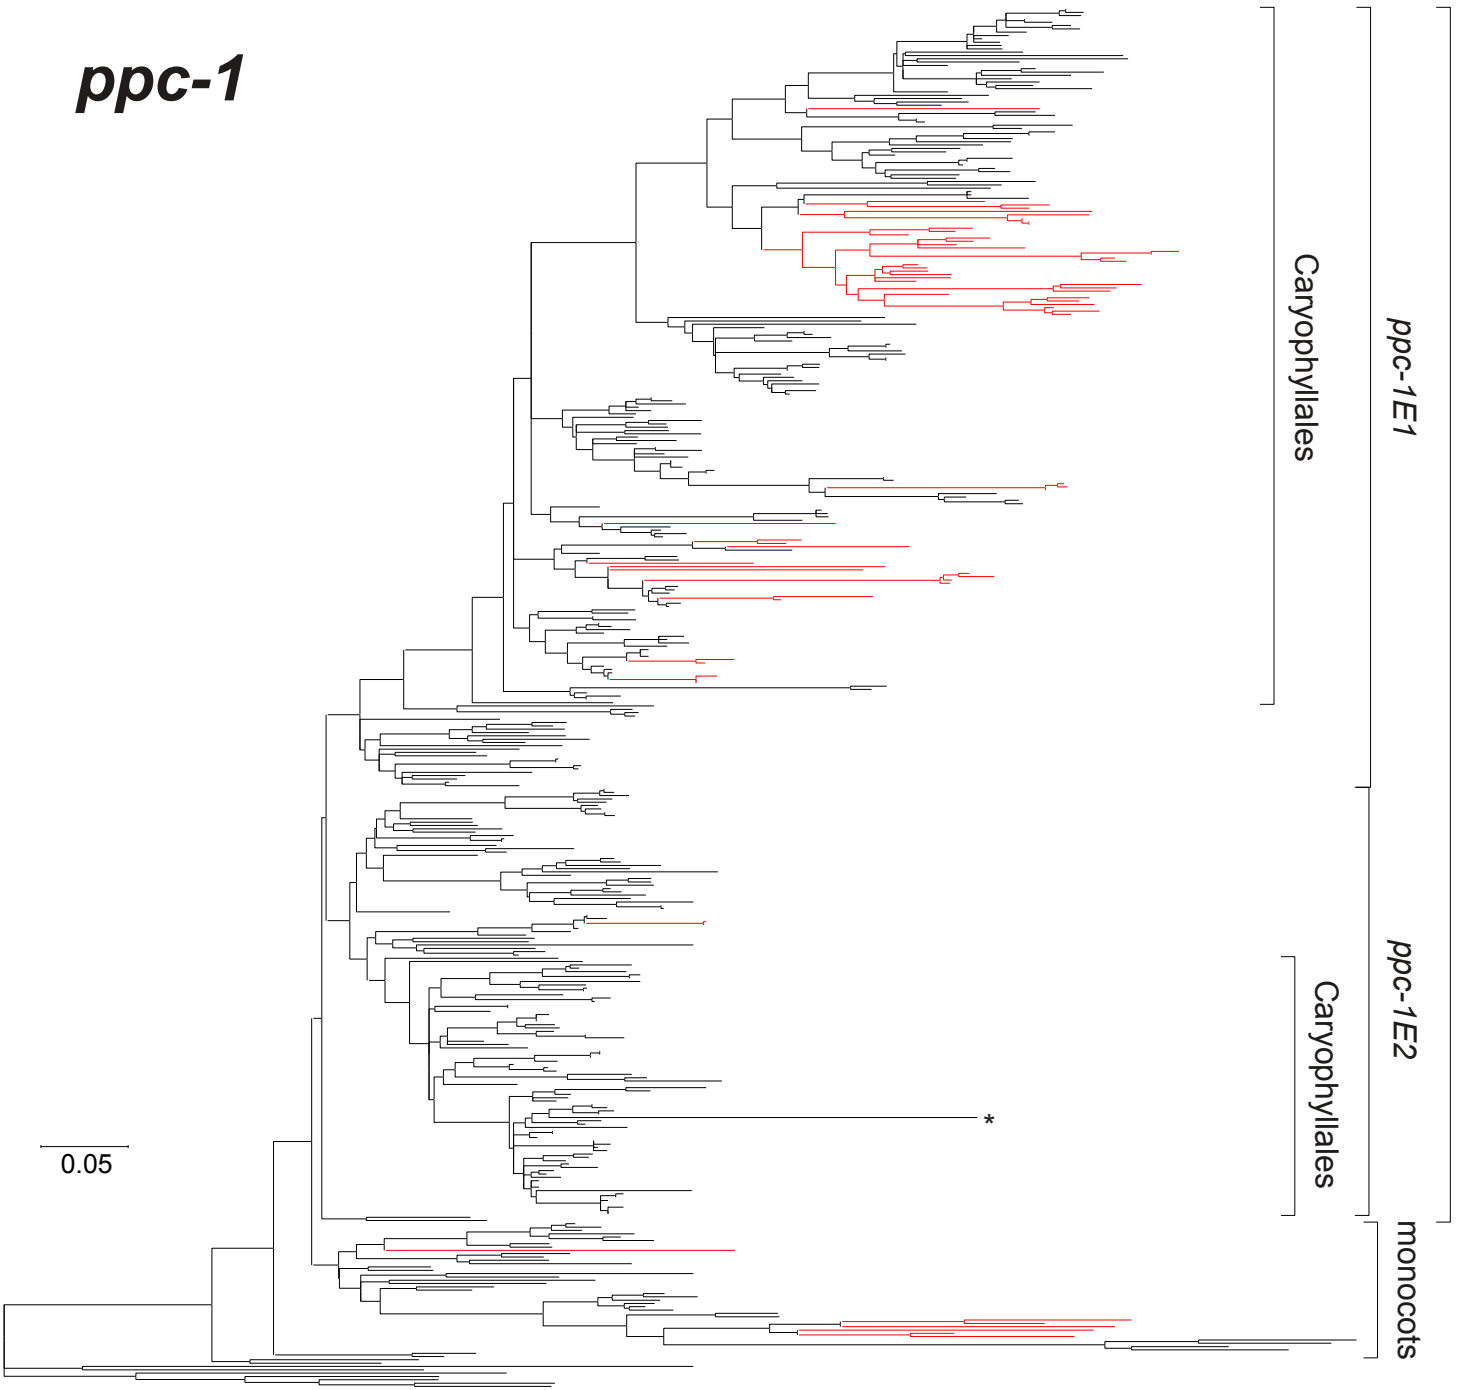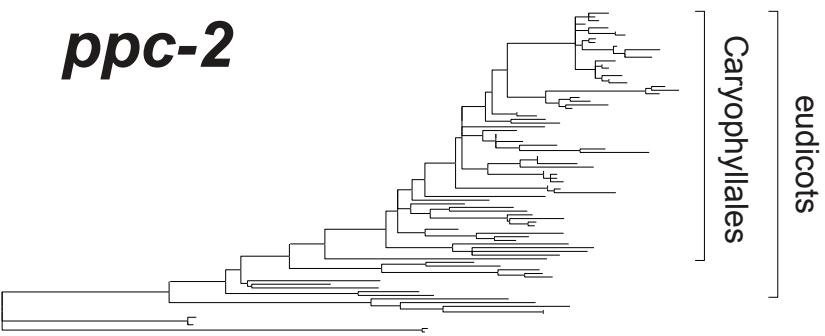

**Supplementary Figure 3: Amino acid changes on genes encoding PEPC.**

The topology was inferred on nucleotide sequences, but branch lengths were estimated based on amino acid sequences. The branch lengths inferred on nucleotide sequences, together with all species names and support values, are available in Figures S1 and S2. The names of the main groups are indicated on the right. Groups of genes containing a Ser780 are highlighted by red branches. The asterisk highlights a pseudogene with multiple stop codons.

**Supplementary Table 1: Sample of Caryophyllales (excluding Portulacineae) used for analyses of PEPC encoding genes.**

| Species                                                       | Voucher                   | <i>ppc-1E1</i>                   | <i>ppc-1E2</i>                     | <i>ppc-2</i> |
|---------------------------------------------------------------|---------------------------|----------------------------------|------------------------------------|--------------|
| <b>Simmondsiaceae</b>                                         |                           |                                  |                                    |              |
| <i>Simmondsia chinensis</i> (Link) C.K. Schneid.              | Clement 235 (YU)          | -                                | KJ161696                           | KJ161762     |
| <b>Polygonaceae</b>                                           |                           |                                  |                                    |              |
| <i>Calligonum microcarpum</i> I.G. Borshch.                   | Sage 0509-17              | KJ161675                         | -                                  | -            |
| <i>Polygonum persicaria</i> L.                                | -                         | -                                | KJ161697                           | -            |
| <b>Caryophyllaceae</b>                                        |                           |                                  |                                    |              |
| <i>Corrigiola litoralis</i> L.                                | FR-0082024 (FR)           | -                                | FN868276                           | -            |
| <i>Silene laciniata</i> Cav.                                  | Clement 236 (Y)           | -                                | KJ161698,<br>KJ161699              | -            |
| <b>Amaranthaceae</b>                                          |                           |                                  |                                    |              |
| <i>Allenrolfea</i> sp.                                        | Christin s.n. (BRU)       | KJ161676                         | -                                  | -            |
| <i>Alternanthera ficoidea</i> (L.) P. Beauv.                  | -                         | AY950666                         | -                                  | -            |
| <i>Alternanthera philoxeroides</i> (Mart.) Griseb.            | Sage 0509-13              | KJ161677,<br>KJ161678            | KJ161700                           | KJ161763     |
| <i>Alternanthera pungens</i> Kunth                            | -                         | AY950665                         | -                                  | -            |
| <i>Alternanthera sessilis</i> (L.) R. Br.                     | -                         | AY950667                         | -                                  | -            |
| <i>Alternanthera</i> sp.                                      | Sage 0509-16              | KJ161679                         | KJ161701                           | -            |
| <i>Amaranthus hypochondriacus</i> L.                          | -                         | Z68125                           | -                                  | -            |
| <i>Atriplex hortensis</i> L.                                  | -                         | -                                | KJ161702                           | KJ161764     |
| <i>Atriplex prostrata</i> Boucher ex DC.                      | -                         | KJ161680                         | -                                  | -            |
| <i>Bieneria sinuspersici</i> Akhani                           | -                         | DQ538352                         | -                                  | -            |
| <i>Chenopodium album</i> L.                                   | -                         | KJ161681                         | -                                  | -            |
| <i>Gomphrena globosa</i> L.                                   | -                         | KJ161682                         | -                                  | -            |
| <i>Haloxylon persicum</i> Bunge ex Boiss. & Buhse             | Sage 0509-H8              | KJ161683                         | KJ161703                           | KJ161765     |
| <i>Suaeda aralocaspica</i> Freitag & Schutze                  | -                         | DQ538353                         | -                                  | -            |
| <i>Suaeda eltonica</i> Iljin                                  | -                         | DQ538354                         | -                                  | -            |
| <i>Suaeda glauca</i> (Bunge) Bunge                            | -                         | -                                | EU629170                           | -            |
| <i>Suaeda linifolia</i> Pall.                                 | -                         | DQ538355                         | -                                  | -            |
| <i>Suaeda</i> sp.                                             | Christin s.n. (BRU)       | -                                | -                                  | KJ161766     |
| <i>Tidestromia lanuginosa</i> (Nutt.) Standl.                 | Higgins et al. 21768 (NY) | KJ161684,<br>KJ161685            | -                                  | -            |
| <i>Tidestromia valdesiana</i> Sánchez-del Pino & Flores Oliv. | Sanchez del Pino (NY)     | KJ161686,<br>KJ161687            | KJ161704,<br>KJ161705,<br>KJ161706 | -            |
| <b>Aizoaceae</b>                                              |                           |                                  |                                    |              |
| <i>Delosperma deilanthoides</i> S.A. Hammer                   | 998369/0 (ZSS)            | -                                | KJ161707,<br>KJ161708              | -            |
| <i>Drosanthemum paxianum</i> Schwantes                        | -                         | Y17844                           | -                                  | -            |
| <i>Mesembryanthemum crystallinum</i> L.                       | -                         | X13660,<br>AJ312642,<br>AJ312643 | -                                  | -            |
| <i>Ruschia rupicola</i> (Engl.) Schwantes                     | Brack 1508 (ZSS)          | -                                | KJ161709                           | -            |
| <i>Sesuvium portulacastrum</i> (L.) L.                        | -                         | KJ161688                         | KJ161710                           | KJ161767     |
| <i>Sesuvium verrucosum</i> Raf.                               | Sage 0509-06              | -                                | KJ161711                           | KJ161768     |
| <i>Trianthema portulacastrum</i> L.                           | Christin 163 (BRU)        | KJ161689                         | -                                  | KJ161769     |
| <i>Trianthema sheilae</i> A.G.Mill. & J.A.Nyberg              | -                         | -                                | KJ161712                           | KJ161770     |
| <i>Zaleya pentandra</i> (L.) C. Jeffrey                       | -                         | KJ161690                         | -                                  | -            |

**Incertae sedis**

|                                                |                  |          |          |          |
|------------------------------------------------|------------------|----------|----------|----------|
| <i>Corbichonia decumbens</i> (Forssk.) Exell   | -                | FN868270 | FN868271 | KJ161771 |
| <i>Hypertelis salsoloides</i> (Burch.) Adamson | Ogburn 143 (BRU) | -        | KJ161713 | KJ161772 |

**Nyctaginaceae**

|                                                 |                                        |          |          |          |
|-------------------------------------------------|----------------------------------------|----------|----------|----------|
| <i>Allionia choisyi</i> Standl.                 | Douglas 2187 (DUKE)                    | -        | KJ161714 | -        |
| <i>Boerhavia coccinea</i> Mill.                 | Douglas 2056 (NY)                      | KJ161691 | KJ161715 | -        |
| <i>Boerhavia spicata</i> Choisy                 | Douglas 2171 (NY)                      | KJ161692 | -        | -        |
| <i>Bougainvillea</i> sp.                        | Cultivated, Botanical Garden<br>Zürich | -        | -        | KJ161773 |
| <i>Commicarpus scandens</i> (L.) Standl.        | -                                      | KJ161693 | KJ161716 | -        |
| <i>Cyphomeris crassifolia</i> (Standl.) Standl. | Douglas 2203                           | KJ161694 | -        | -        |
| <i>Mirabilis jalapa</i> L.                      | -                                      | KJ161695 | -        | -        |

**Phytolaccaceae**

|                             |                |   |          |          |
|-----------------------------|----------------|---|----------|----------|
| <i>Phytolacca dioica</i> L. | 871040/0 (ZSS) | - | KJ161717 | KJ161774 |
|-----------------------------|----------------|---|----------|----------|

**Limeaceae**

|                                   |                  |   |          |          |
|-----------------------------------|------------------|---|----------|----------|
| <i>Limeum aethiopicum</i> Burm.f. |                  | - | FN868277 | -        |
| <i>Limeum subnudum</i> Friedrich  | Ogburn 154 (BRU) | - | KJ161718 | KJ161775 |

**Molluginaceae**

|                                                           |                                       |                       |          |          |
|-----------------------------------------------------------|---------------------------------------|-----------------------|----------|----------|
| <i>Adenogramma glomerata</i> Druce                        | Ogburn 142 (BRU)                      | FN868266              | -        | -        |
| <i>Adenogramma teretifolia</i> Adamson                    | Ogburn 156 (BRU)                      | FN868267              | KJ161719 | KJ161776 |
| <i>Hypertelis spergulacea</i> E. Mey. ex Fenzl            | Giess et al. 5366 (K)                 | FN868290              | FN868289 | -        |
| <i>Mollugo cerviana</i> (L.) Ser.                         | Atwood & Welsh 10684 (NY)             | FN868297,<br>FN868296 | KJ161720 | KJ161777 |
| <i>Mollugo cerviana</i> (L.) Ser.                         | Shekhawat 2008                        | FN868294,<br>FN868295 | -        | -        |
| <i>Mollugo cerviana</i> (L.) Ser.                         | Thulin et al. 11211 (UPS)             | FN868298,<br>FN868299 | -        | -        |
| <i>Mollugo cerviana</i> (L.) Ser.                         | Potgieter 225 (K)                     | FN868301              | FN868287 | -        |
| <i>Mollugo cerviana</i> (L.) Ser.                         | J. Sánchez Sánchez s.n. (G)           | FN868300              | FN868288 | KJ161778 |
| <i>Mollugo cerviana</i> (L.) Ser.                         | Lazarides & Palmer 243<br>(CANB)      | FN868291              | FN868285 | -        |
| <i>Mollugo cerviana</i> (L.) Ser.                         | G. Leach 2008 (CANB)                  | FN868292              | -        | -        |
| <i>Mollugo cerviana</i> (L.) Ser.                         | Smyth 213 (CANB)                      | FN868293              | -        | -        |
| <i>Mollugo molluginis</i> (F.Muell.) Druce                | Telford 11746 (CANB)                  | FN868275              | -        | -        |
| <i>Mollugo nudicaulis</i> Lam.                            | Liogier 16585 (NY)                    | FN868284              | -        | -        |
| <i>Mollugo nudicaulis</i> Lam.                            | Devi Sept 1961 (CANB)                 | FN868281,<br>FN868280 | FN868282 | -        |
| <i>Mollugo nudicaulis</i> Lam.                            | Thulin & Bashir-Mohamed<br>6759 (UPS) | FN868283              | -        | -        |
| <i>Mollugo pentaphylla</i> L.                             | Nee 42741 (NY)                        | FN868272              | -        | -        |
| <i>Mollugo verticillata</i> L.                            | Sage & Sage 8-2007 (TRT)              | FN868273              | KJ161721 | -        |
| <i>Mollugo verticillata</i> L.                            | M. Nee 37372 (G)                      | FN868274              | -        | -        |
| <i>Pharnaceum incanum</i> L.                              | Ogburn 148 (BRU)                      | FN868268              | -        | -        |
| <i>Pharnaceum lanuginosum</i> J.C. Manning<br>& Goldblatt | Ogburn 161 (BRU)                      | -                     | KJ161722 | KJ161779 |
| <i>Psammotropha obovata</i> Adamson                       | Hilliard & Burtt 7095 (K)             | -                     | FN868278 | -        |
| <i>Psammotropha quadrangularis</i> (L. f.)<br>Fenzl       | Ogburn 160 (BRU)                      | FN868269              | -        | -        |

**Supplementary Table 2: List of Portulacineae genes encoding PEPC analysed**

| Species                                                 | Voucher                                                              | <i>ppc-1E1a</i>       | <i>ppc-1E1b</i> | <i>ppc-1E1c</i>       | <i>ppc-1E1d</i> | <i>ppc-1E1e</i>       | <i>ppc-1E2</i> | <i>ppc-2</i> |
|---------------------------------------------------------|----------------------------------------------------------------------|-----------------------|-----------------|-----------------------|-----------------|-----------------------|----------------|--------------|
| <b>Montiaceae</b>                                       |                                                                      |                       |                 |                       |                 |                       |                |              |
| <i>Cistanthe monandra</i> (Nutt.)<br>Hershkovitz        | Ogburn 137 (BRU)                                                     | KJ161552              | -               | KJ161591,<br>KJ161592 | -               | -                     | KJ161723       | KJ161780     |
| <i>Cistanthe tweedyi</i> (A. Gray) Hersk.               | Ogburn 182 (BRU)                                                     | -                     | -               | -                     | -               | -                     | KJ161724       | KJ161781     |
| <i>Claytonia rubra</i> (Howell) Tidestr.                | Ogburn 183 (BRU)                                                     | -                     | -               | -                     | -               | -                     | KJ161725       | KJ161782     |
| <i>Lewisia rediviva</i> Pursh                           | Ogburn 185 (BRU)                                                     | KJ161553              | -               | -                     | -               | -                     | -              | KJ161783     |
| <i>Montia linearis</i> (Douglas ex Hook.)<br>Greene     | Ogburn 287 (BRU)                                                     | KJ161554              | -               | -                     | -               | -                     | KJ161726       | KJ161784     |
| <i>Claytonia sibirica</i> (L.) Howell                   | Ogburn n.a. (BRU) - Brown<br>greenhouse                              | KJ161555,<br>KJ161556 | -               | -                     | -               | -                     | -              | -            |
| <i>Montiopsis gayana</i> (Barnéoud) D.I.<br>Ford        | Ogburn 268 (BRU)                                                     | -                     | -               | -                     | -               | -                     | KJ161727       | KJ161785     |
| <i>Montiopsis gilliesii</i> (Hook. & Arn.)<br>D.I. Ford | Ogburn 166 (BRU)                                                     | KJ161557              | -               | -                     | -               | -                     | -              | KJ161786     |
| <i>Phemeranthus napiformis</i> (DC.) Raf.               | Ogburn 226 (BRU)                                                     | -                     | -               | KJ161593              | -               | -                     | -              | -            |
| <b>Halophytaceae</b>                                    |                                                                      |                       |                 |                       |                 |                       |                |              |
| <i>Halophytum ameghinoi</i> (Speg.) Speg.               | Edwards 255 (BRU)                                                    | -                     | KJ161569        | KJ161594              | -               | -                     | KJ161728       | KJ161787     |
| <b>Basellaceae</b>                                      |                                                                      |                       |                 |                       |                 |                       |                |              |
| <i>Anredera baselloides</i> (Kunth) Baill.              | Ogburn 256 (BRU)                                                     | KJ161558              | KJ161570        | KJ161595              | -               | -                     | -              | KJ161788     |
| <i>Anredera cordifolia</i> (Ten.) Steenis               | 913635/b (ZSS) - Hofstätter<br>s/n, Madagascar                       | -                     | -               | KJ161596              | -               | -                     | KJ161729       | KJ161789     |
| <i>Anredera ramosa</i> (Moq.) Eliasson                  | 981287/0 (ZSS) - Mostul<br>1254, Mexico, Veracruz                    | -                     | -               | KJ161597              | -               | -                     | -              | -            |
| <i>Basella alba</i> L.                                  | Endara 1638 (FLAS) -<br>Kanapaha Bot. Garden,<br>Gainesville, FL     | KJ161559              | -               | -                     | -               | -                     | -              | KJ161790     |
| <i>Ullucus tuberosus</i> Caldas                         | 101123/0 (ZSS) - Bot.<br>Garden Bonn                                 | -                     | -               | KJ161598              | -               | -                     | KJ161730       | KJ161791     |
| <b>Didiereaceae</b>                                     |                                                                      |                       |                 |                       |                 |                       |                |              |
| <i>Alluaudia ascendens</i> (Drake) Drake                | 823558/0 (ZSS) - received<br>from Hauenstein, cultivated             | KJ161560              | -               | -                     | KJ161625        | -                     | -              | -            |
| <i>Alluaudia procera</i> (Drake) Drake                  | 995323/0 (ZSS) - cultivated                                          | KJ161561              | -               | KJ161599              | KJ161626        | KJ161642,<br>KJ161643 | KJ161731       | KJ161792     |
| <i>Alluaudiopsis marnieriana</i> Rauh                   | 812213/0 (ZSS) - Bot.<br>Garden Heidelberg                           | KJ161562              | -               | KJ161600              | -               | -                     | KJ161732       | KJ161793     |
| <i>Ceraria longipedunculata</i> Merxm. &<br>Podlech     | 901396/0 (ZSS) - Lavranos<br>& Bleck s/n, Namibia                    | KJ161563              | -               | KJ161601              | -               | KJ161644              | -              | KJ161794     |
| <i>Ceraria pygmaea</i> (Pillans)<br>G.D.Rowley          | Lavranos 22309 (ZSS)                                                 | -                     | -               | -                     | -               | -                     | -              | KJ161795     |
| <i>Decarya madagascariensis</i> Choux                   | Rauh 7592 (ZSS)                                                      | -                     | -               | -                     | -               | -                     | KJ161733       | KJ161796     |
| <i>Didierea madagascariensis</i> Baill.                 | 931246/0 (ZSS) - Rauh<br>M1803, Madagascar                           | -                     | -               | KJ161602              | -               | KJ161645,<br>KJ161646 | KJ161734       | KJ161797     |
| <i>Portulacaria afra</i> Jacq.                          | 995326/0 (ZSS) - cultivated                                          | -                     | KJ161571        | KJ161603,<br>KJ161604 | -               | -                     | KJ161735       | KJ161798     |
| <b>Talinaceae</b>                                       |                                                                      |                       |                 |                       |                 |                       |                |              |
| <i>Talinum arnotii</i> Hook. f.                         | 932096 (ZSS)                                                         | -                     | -               | -                     | -               | -                     | KJ161736       | KJ161799     |
| <i>Talinum aurantiacum</i> Engelm.                      | Ogburn 267 (BRU)                                                     | -                     | -               | -                     | -               | KJ161647              | -              | -            |
| <i>Talinum paniculatum</i> (Jacq.) Gaertn.              | 941354/0 (ZSS) -<br>Leuenberger & Egli 4364,<br>Argentina, Catamarca | -                     | KJ161572        | KJ161605              | -               | KJ161648              | KJ161737       | KJ161800     |
| <i>Talinum</i> sp.                                      | 961663/a (ZSS)                                                       | -                     | -               | -                     | -               | -                     | KJ161738       | KJ161802     |
| <i>Talinum triangulare</i> (Jacq.) Willd.               | Ogburn n.a. (BRU) - Brown<br>greenhouse                              | -                     | -               | KJ161606              | -               | -                     | -              | -            |
| <i>Talinella pachypoda</i> Egli                         | 952546/0 (ZSS) - Hoffman<br>347, Madagascar                          | -                     | -               | KJ161607              | -               | KJ161649              | -              | KJ161801     |
| <b>Anacampserotaceae</b>                                |                                                                      |                       |                 |                       |                 |                       |                |              |
| <i>Anacampseros albissima</i> Marloth                   | Ogburn 255 (BRU)                                                     | -                     | KJ161573        | KJ161608              | KJ161627        | -                     | KJ161739       | KJ161803     |
| <i>Anacampseros filamentosa</i> Sims                    | Ogburn 36 (MO)                                                       | -                     | KJ161574        | -                     | KJ161628        | -                     | -              | -            |
| <i>Anacampseros kurtzii</i> Bacigalupo                  | Spriggs n.a. (BRU) - Brown<br>greenhouse                             | KJ161564              | -               | KJ161609              | KJ161629        | -                     | -              | KJ161804     |

|                                                                        |                                                                                            |                  |                    |          |          |                    |                    |          |
|------------------------------------------------------------------------|--------------------------------------------------------------------------------------------|------------------|--------------------|----------|----------|--------------------|--------------------|----------|
| <i>Anacampseros retusa</i> Poelln.                                     | 803518/a (ZSS) - Cape Province                                                             | KJ161565         | KJ161575           | KJ161610 | KJ161630 | -                  | KJ161740           | KJ161805 |
| <i>Grahamia bracteata</i> Gillies ex Hook.                             | Ogburn n.a. (BRU) - Brown greenhouse                                                       | KJ161566         | KJ161576           | KJ161611 | KJ161631 | -                  | KJ161741           | KJ161806 |
| <b>Portulacaceae</b>                                                   |                                                                                            |                  |                    |          |          |                    |                    |          |
| <i>Portulaca fulgens</i> Griseb.                                       | 995813/0 (ZSS) - Leuenberger & Eggli 4896, Argentina, Tucuman                              | -                | KJ161577           | -        | -        | -                  | KJ161742           | KJ161807 |
| <i>Portulaca grandiflora</i> Hook.                                     | 998914/0 (ZSS) - Hunkeler 591, Argentina, Catamarca                                        | -                | KJ161578, KJ161579 | -        | -        | -                  | -                  | -        |
| <i>Portulaca molokiniensis</i> Hobdy                                   | 921793/0 (ZSS) - Wong n.a., Hawaii, Molokini Island                                        | -                | -                  | -        | -        | -                  | KJ161743           | KJ161808 |
| <i>Portulaca oleracea</i> L.                                           | Sage 0509-01                                                                               | -                | KJ161580           | -        | -        | -                  | KJ161744, KJ161809 | KJ161745 |
| <b>Cactaceae - Pereskia</b>                                            |                                                                                            |                  |                    |          |          |                    |                    |          |
| <i>Pereskia aculeata</i> Mill.                                         | Ogburn n.a. (BRU) - Brown greenhouse                                                       | X95860, KJ161567 | -                  | KJ161612 | KJ161632 | -                  | -                  | -        |
| <i>Pereskia aureiflora</i> F. Ritter                                   | 166-54-83-20 (B) - R. Nyffeler                                                             | KJ161568         | -                  | KJ161613 | KJ161633 | KJ161650           | KJ161746           | KJ161810 |
| <i>Pereskia bleo</i> (Kunth) DC.                                       | Ogburn n.a. (BRU) - Brown greenhouse                                                       | -                | -                  | KJ161614 | -        | KJ161651           | KJ161747           | KJ161811 |
| <i>Pereskia diaz-romeroana</i> Cárdenas                                | Arakaki n.a. (BRU) - Brown greenhouse                                                      | -                | -                  | KJ161615 | KJ161634 | KJ161652           | KJ161748           | KJ161812 |
| <i>Pereskia grandifolia</i> Haw.                                       | Ogburn n.a. (BRU) - Brown greenhouse                                                       | -                | -                  | KJ161616 | KJ161635 | KJ161653           | KJ161749           | KJ161813 |
| <i>Pereskia guamacho</i> F.A.C. Weber                                  | Arakaki n.a. (BRU) - Brown greenhouse                                                      | -                | -                  | KJ161617 | KJ161636 | -                  | KJ161750           | KJ161814 |
| <i>Pereskia portulacifolia</i> (L.) DC.                                | Ogburn n.a. (BRU) - Brown greenhouse                                                       | -                | -                  | KJ161618 | KJ161637 | KJ161654           | KJ161751           | KJ161815 |
| <i>Pereskia quisqueyana</i> Alain                                      | Ogburn n.a. (BRU) - Brown greenhouse                                                       | -                | -                  | -        | KJ161638 | -                  | -                  | KJ161816 |
| <i>Pereskia sacharosa</i> Griseb.                                      | Arakaki n.a. (BRU) - Brown greenhouse                                                      | -                | -                  | -        | -        | -                  | KJ161752           | KJ161817 |
| <i>Pereskia zinniflora</i> DC.                                         | 842526/a (ZSS) - Cuba, Sancti Spiritus                                                     | -                | KJ161581           | -        | KJ161639 | -                  | KJ161753           | KJ161818 |
| <b>Cactaceae - Opuntioideae</b>                                        |                                                                                            |                  |                    |          |          |                    |                    |          |
| <i>Brasiliopuntia brasiliensis</i> (Willd.) A. Berger                  | Ogburn n.a. (BRU) - Brown greenhouse                                                       | -                | -                  | -        | -        | KJ161655, KJ161656 | -                  | -        |
| <i>Cylindropuntia kleiniae</i> (DC.) F.M. Knuth aff                    | Ogburn n.a. (BRU) - Brown greenhouse                                                       | -                | KJ161582           | -        | -        | KJ161657, KJ161658 | KJ161754           | KJ161819 |
| <i>Maihueiopsis glomerata</i> (Haw.) R. Kiesling                       | Arakaki 1905 (BRU) - 55 from Mesa Garden Nursery 1.932 (D. Ferguson 280), Argentina, Salta | -                | KJ161583           | -        | -        | -                  | KJ161755           | KJ161820 |
| <i>Nopalea cochenellifera</i> (DC.) F.M. Knuth aff                     | Ogburn n.a. (BRU) - Brown greenhouse                                                       | -                | -                  | KJ161830 | -        | KJ161659, KJ161660 | KJ161756           | KJ161821 |
| <i>Pereskiaopsis diguetii</i> (F.A.C. Weber) Britton & Rose            | 942160/b (ZSS) - Lomelí Sención & Díaz L. s/n, Mexico, Jalisco                             | -                | KJ161584           | -        | -        | KJ161661           | KJ161757           | KJ161822 |
| <i>Pereskiaopsis gatesii</i> Baxter                                    | Ogburn n.a. (BRU) - Brown greenhouse                                                       | -                | KJ161585           | KJ161619 | -        | KJ161662, KJ161663 | -                  | -        |
| <i>Pereskiaopsis porteri</i> (Brandege ex F.A.C. Weber) Britton & Rose | Ogburn n.a. (BRU) - Brown greenhouse                                                       | -                | -                  | -        | -        | KJ161664, KJ161665 | KJ161758           | KJ161823 |
| <i>Quiabentia verticillata</i> (Vaupel) Vaupel ex Berger               | Ogburn n.a. (BRU) - Brown greenhouse                                                       | -                | KJ161586           | -        | -        | KJ161666           | -                  | -        |
| <i>Quiabentia zehntneri</i> (Britton & Rose) Britton & Rose            | 864369 (ZSS)                                                                               | -                | -                  | -        | -        | -                  | KJ161759           | KJ161824 |
| <i>Tephrocactus articulatus</i> (Pfeiff.) Backeb.                      | Spriggs n.a. (BRU) - Brown greenhouse                                                      | -                | KJ161587           | KJ161620 | -        | KJ161667           | KJ161760           | KJ161825 |
| <b>Cactaceae - Cactoideae</b>                                          |                                                                                            |                  |                    |          |          |                    |                    |          |
| <i>Acanthocereus tetragonus</i> (L.) Hummelinck                        | 892219 (ZSS) - brought by R. Nyffeler                                                      | -                | -                  | -        | -        | KJ161668, KJ161669 | -                  | -        |
| <i>Coryphantha radians</i> (DC.) Britton & Rose                        | Arakaki 1898 (BRU) - from Mesa Garden Nursery 125 (S.Brack 679), Mexico, Hidalgo           | -                | KJ161588           | -        | -        | KJ161670           | -                  | KJ161826 |

|                                                                   |                                                                                    |   |   |          |          |          |                    |          |
|-------------------------------------------------------------------|------------------------------------------------------------------------------------|---|---|----------|----------|----------|--------------------|----------|
| <i>Echinocactus grusonii</i> Hildm.                               | Spriggs n.a. (BRU) - Brown greenhouse                                              | - | - | KJ161621 | KJ161640 | -        | -                  | -        |
| <i>Echinocereus pectinatus</i> (Scheidw.) Engelm.                 | -                                                                                  | - | - | KJ161831 | -        | -        | -                  | -        |
| <i>Hylocereus undatus</i> (Haw.) Britton & Rose                   | -                                                                                  | - | - | JF966382 | -        | JF966381 | -                  | -        |
| <i>Mammillaria plumosa</i> F.A.C. Weber                           | Arakaki 1907 - from Mesa Garden Nursery 845.5 (S. Brack 327), Mexico, Coahuila     | - | - | KJ161589 | KJ161622 | -        | KJ161671           | -        |
| <i>Selenicereus wittii</i> (K. Schum.) G.D. Rowley                | -                                                                                  | - | - | -        | -        | -        | -                  | -        |
| <i>Thelocactus leucacanthus</i> (Zucc. Ex Pfeiff.) Britton & Rose | Arakaki 1912 (BRU) - from Mesa Garden Nursery 1273 (S. Brack 514), Mexico, Hidalgo | - | - | KJ161590 | KJ161623 | KJ161641 | KJ161672, KJ161761 | KJ161828 |
| <i>Weingartia kargliana</i> Rausch                                | 782218/b (ZSS) - Rausch 677, Bolivia, N of Tupiza                                  | - | - | KJ161624 | -        | KJ161674 | -                  | KJ161829 |

---

**Supplementary Table 3: Additional primers used for PCR amplification of Caryophyllales genes encoding PEPC.**

| <b>Name</b>         | <b>Primer</b>           | <b>Target</b>      |
|---------------------|-------------------------|--------------------|
| <i>ppc-1588-For</i> | GGKGCATACATYATCTCCATG   | all <i>ppc-1E1</i> |
| <i>ppc-1621-For</i> | TCRGATGTGCTTGCTGTTGAG   | all <i>ppc-1E1</i> |
| <i>ppc-1792-For</i> | ATGATTGGRTACTCTGATTC    | all <i>ppc-1E1</i> |
| <i>ppc-2261-For</i> | TGAACATTGGAAGCCGTCC     | all <i>ppc-1E1</i> |
| <i>ppc-2761-Rev</i> | CTTGGATAAGTGAGGCCTCTC   | <i>ppc-1E1a</i>    |
| <i>ppc-2831-Rev</i> | CAGGAGCATACTCACTGGAGG   | <i>ppc-1E1b</i>    |
| <i>ppc-2846-Rev</i> | GGTGTCTCAAGGCCAGGAG     | all <i>ppc-1E1</i> |
| <i>ppc-2874-Rev</i> | GCAGCAATACCTTTCATGGTG   | <i>ppc-1E1c</i>    |
| <i>ppc-2748-Rev</i> | ATGCCATYAGTTCTTTGGATAAG | <i>ppc-1E1c</i>    |
| <i>ppc-1363-For</i> | ATTCGYCAAGAATCTGACCG    | <i>ppc-1E2</i>     |
| <i>ppc-2452-Rev</i> | GTRACCCTAAAGAAAGGCCATTC | <i>ppc-1E2</i>     |
| <i>ppc-1884_For</i> | GCARGGAGARATGGTRCAGGC   | <i>ppc-2</i>       |
| <i>ppc-2633-Rev</i> | ATRGTGATSAGCAATGCRTCTC  | <i>ppc-2</i>       |
| <i>ppc-2651-Rev</i> | AGCAGCAATYCCATTAATAG    | <i>ppc-2</i>       |



**Supplementary Table 4: Water treatment of *Portulaca oleracea* plants**

| Date       | Group A              | Group B              |
|------------|----------------------|----------------------|
| 05.03.2012 | watered <sup>1</sup> | watered <sup>1</sup> |
| 08.03.2012 | watered              |                      |
| 11.03.2012 | watered              |                      |
| 13.03.2012 | watered              |                      |
| 15.03.2012 | watered              | watered              |
| 17.03.2012 | watered              |                      |
| 19.03.2012 | watered              |                      |
| 22.03.2012 | watered              | watered              |
| 26.03.2012 | watered              |                      |
| 31.03.2012 | watered <sup>1</sup> | watered <sup>1</sup> |
| 04.04.2012 | watered              |                      |
| 06.04.2012 | sampled              | sampled              |

<sup>1</sup>Nutrients added

**Supplementary Table 5: Sequencing and mapping statistics.**

| Time<br>Condition                       | Day        |           | Night     |            | Day       |           | Night     |           |
|-----------------------------------------|------------|-----------|-----------|------------|-----------|-----------|-----------|-----------|
|                                         | Watered    |           |           |            | Drought   |           |           |           |
| Individual                              | 1          | 2         | 1         | 2          | 3         | 4         | 3         | 4         |
| Pairs of reads<br>sequenced             | 11,980,617 | 7,440,608 | 7,519,679 | 11,832,946 | 7,311,777 | 8,168,471 | 8,659,554 | 7,785,604 |
| Pairs of reads<br>used in<br>assemblies | 10,017,935 | 5,886,163 | 5,708,027 | 6,352,153  | 6,286,010 | 6,352,153 | 7,403,534 | 6,957,525 |
| Contigs                                 | 47,047     | 44,957    | 43,749    | 66,755     | 40,334    | 56,987    | 48,471    | 55,248    |
| Percent reads<br>aligned                | 89.11      | 86.84     | 86.98     | 80.58      | 88.3      | 86.96     | 87.45     | 86.34     |

**Supplementary Table 6: Expression levels in rpm of C<sub>4</sub>-related genes in day and night samples of *Portulaca oleracea* plants grown in different conditions<sup>1</sup>.**

| Time<br>Condition<br>Individual | Day     |        | Night  |        | Day     |        | Night  |        |
|---------------------------------|---------|--------|--------|--------|---------|--------|--------|--------|
|                                 | Watered |        |        |        | Drought |        |        |        |
|                                 | 1       | 2      | 1      | 2      | 3       | 4      | 3      | 4      |
| ALA-AT-1                        | 2,382   | 1,095  | 3,723  | 2,722  | 775     | 306    | 651    | 539    |
| ASP-AT-1                        | 83      | 105    | 175    | 134    | 78      | 202    | 83     | 96     |
| ASP-AT-2                        | 743     | 500    | 444    | 222    | 438     | 162    | 120    | 90     |
| ASP-AT-3                        | 0       | 0      | 0      | 0      | 0       | 0      | 0      | 0      |
| ASP-AT-4                        | 2,111   | 1,430  | 1,141  | 798    | 680     | 650    | 329    | 375    |
| β-CA-1                          | 0       | 0      | 0      | 0      | 0       | 0      | 0      | 0      |
| β-CA-2                          | 714     | 649    | 273    | 298    | 332     | 423    | 255    | 253    |
| β-CA-3                          | 658     | 325    | 291    | 139    | 208     | 66     | 53     | 28     |
| β-CA-4                          | 20,880  | 10,296 | 9,775  | 6,476  | 10,818  | 2,021  | 1,631  | 1,505  |
| NAD-MDH-1                       | 22      | 12     | 15     | 19     | 16      | 74     | 40     | 35     |
| NAD-MDH-2                       | 675     | 532    | 363    | 197    | 630     | 628    | 207    | 179    |
| NAD-MDH-3                       | 1171    | 1168   | 292    | 239    | 837     | 371    | 146    | 132    |
| NAD-ME-1                        | 643     | 666    | 534    | 501    | 648     | 499    | 535    | 560    |
| NAD-ME-2                        | 1131    | 990    | 947    | 804    | 838     | 617    | 636    | 591    |
| NADP-MDH-1                      | 1,956   | 2,300  | 20     | 2,359  | 1,357   | 1,793  | 1,812  | 2,263  |
| NADP-MDH-2                      | 13      | 231    | 40     | 11     | 4       | 21     | 10     | 20     |
| NADP-MDH-3                      | 648     | 520    | 534    | 523    | 939     | 764    | 1,141  | 1,246  |
| NADP-ME-1                       | 1,184   | 896    | 215    | 313    | 1,021   | 651    | 385    | 281    |
| NADP-ME-2                       | 0       | 0      | 0      | 17     | 0       | 0      | 0      | 0      |
| NADP-ME-3                       | 42      | 19     | 102    | 0      | 75      | 86     | 211    | 257    |
| PCK-1                           | 21      | 13     | 28     | 77     | 10      | 11     | 41     | 48     |
| PPDK-1                          | 26,696  | 24,814 | 21,010 | 21,105 | 29,855  | 18,778 | 11,463 | 10,164 |

<sup>1</sup> ALA-AT = alanine aminotransferase, ASP-AT = aspartate aminotransferase, β-CA = β-carbonic anhydrase, NAD-MDH = NAD-malate dehydrogenase, NAD-ME = NAD-malic enzyme, NADP-MDH = NADP-malate dehydrogenase, NADP-ME = NADP-malic enzyme, PCK = phosphoenolpyruvate carboxykinase, PPDK = pyruvate, phosphate dikinase.
